# Supplementary material for: A conveniently synthesized polyethylene gel encapsulating palladium nanoparticles as a reusable high-performance catalyst for Heck and Suzuki coupling reactions
Source: Royal Society of Chemistry journal article supplement (doi:10.1039/c3ta13106h), 2013-01-01
Supplement: c3ta13106h.pdf [file c3ta13106h.pdf]

# **A Conveniently Synthesized Polyethylene Gel Encapsulating Palladium Nanoparticles as a Reusable High-Performance Catalyst for Heck and Suzuki Coupling Reactions**

**Pingwei Liu,<sup>a,b</sup> Zhongming Dong,<sup>b</sup> Zhibin Ye,<sup>b,c,\*</sup> Wen-Jun Wang,<sup>a,d,\*</sup> and Bo-Geng Li<sup>a</sup>**

<sup>a</sup> *State Key Lab of Chemical Engineering, Department of Chemical and Biological Engineering, Zhejiang University, Hangzhou, Zhejiang 310027, China. Fax: +86 571 87952772; Tel: +86 571 87952772; E-mail: wenjunwang@zju.edu.cn*

<sup>b</sup> *Bharti School of Engineering, Laurentian University, Sudbury, Ontario P3E 2C6, Canada. Tel: +1 705 6751151 ext.2343; Fax: +1 705 6754862; E-mail: zye@laurentian.ca*

<sup>c</sup> *Department of Chemistry and Biochemistry, Laurentian University, Sudbury, Ontario P3E 2C6, Canada.*

<sup>d</sup> *Key Lab of Biomass Chemical Engineering of Ministry of Education, Zhejiang University, Hangzhou, Zhejiang 310027, China.*

## Tables and Figures

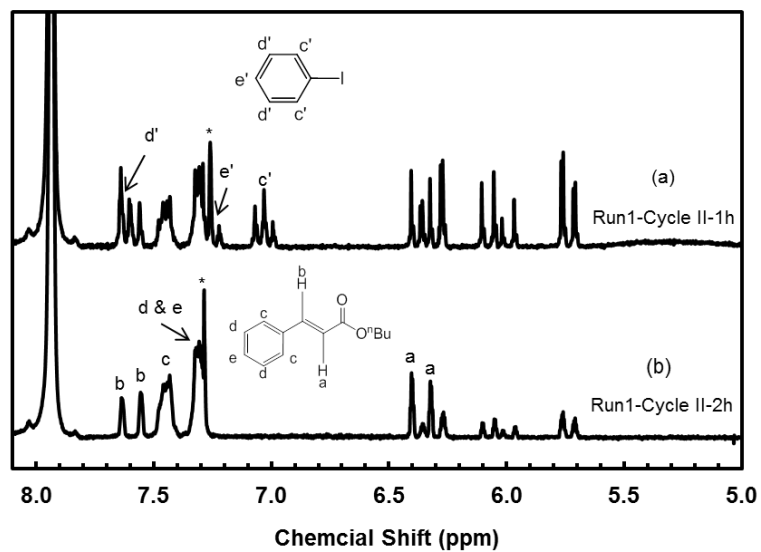

**Figure S1.** <sup>1</sup>H NMR (200 MHz) spectra of (a) Run1-Cycle II-1h and (b) Run1-Cycle II-1h in CDCl<sub>3</sub>. The signals marked with an asterisk (\*) result from the CHCl<sub>3</sub> in the deuterated solvent.

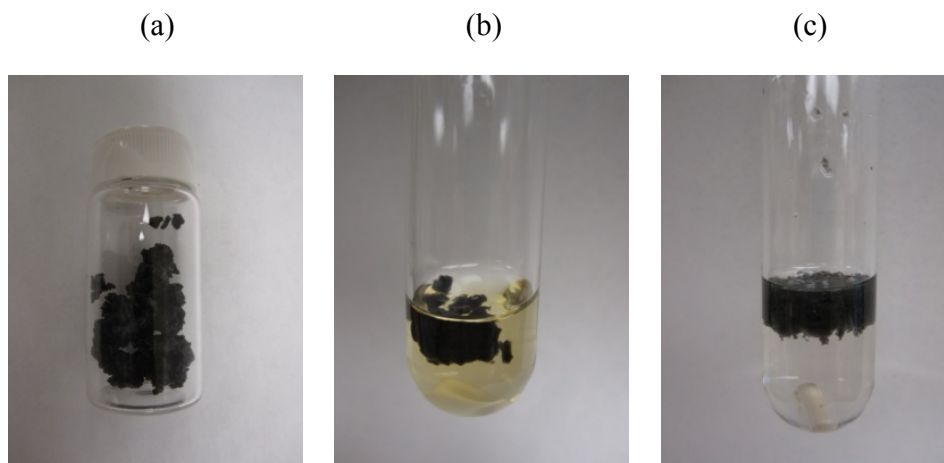

**Figure S2.** Appearances of (a) PE gel product, (b) PE gel in reaction system of Cycle I, and (c) PE gel of Cycle IV in Heck reaction of iodobenzene (IB) and n-butyl acrylate (nBA).

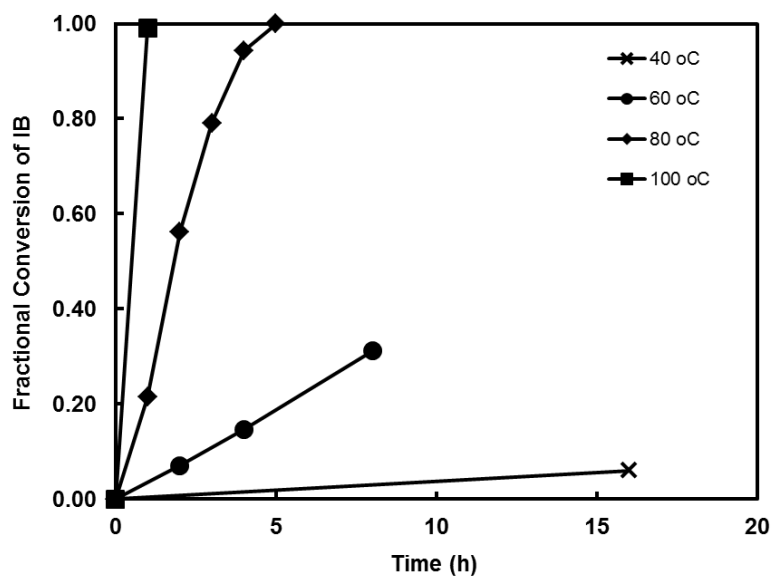

Figure S3. Heck reaction of IB and nBA with the PE gel **2** as catalyst at 40, 60, 80, and 100 °C.  $[Pd]_0/[IB]_0 = 0.15\%$ , 0.5 g of IB in 3 mL of DMF,  $[IB]_0:[nBA]_0:[NEt_3]_0 = 1:1.5:1.5$ .

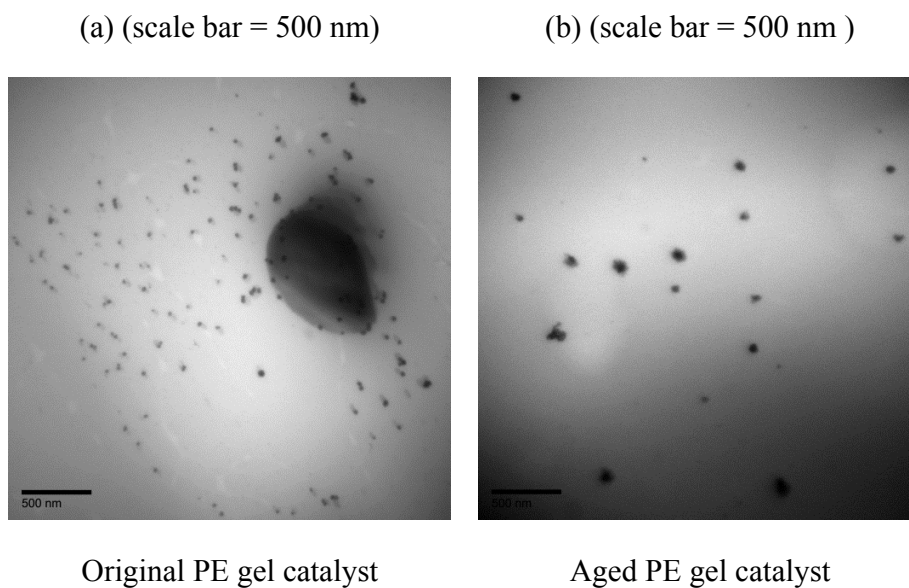

Figure S4. TEM micrographs (a magnification of 50 K times, scale bar = 500 nm) of (a) original PE gel encapsulating Pd nanoparticles and (b) aged PE gel catalyst after a three-cycle recycling at 100 °C with 24 h for each cycle.

**Reference:**

- [1] Johnson LK, Killian CM, Brookhart M. New Pd(II)- and Ni(II)-Based Catalysts for Polymerization of Ethylene and  $\alpha$ -Olefins. *Journal of the American Chemical Society*. 1995;117:6414-5.
- [2] Ye JD, Ye ZB, Zhu SP. Synthesis and characterization of hyperbranched polyethylenes containing cross-linking structures by chain walking copolymerization of ethylene with diacrylate comonomer. *Polymer*. 2008;49:3382-92.
